# Supplementary material for: Tumor microenvironment characterization in triple-negative breast cancer identifies prognostic gene signature
Source: publisher site journal article supplement (doi:10.18632/aging.202478), 2021-02-01
Supplement: Supplementary file [file aging-v13i4-202478-supplementary-material-SD2.pdf]

## SUPPLEMENTARY TABLE

**Supplementary Table 1. Clinical characteristics of the TNBC patients with different TME scores.**

| Characteristics               | Low risk group | High risk group | P value |
|-------------------------------|----------------|-----------------|---------|
| Age (mean (SD))               | 54.52(13.01)   | 57.16(14.58)    | 0.100   |
| NPI (mean (SD))               | 4.62(0.92)     | 4.55(0.99)      | 0.524   |
| Cellularity (%)               |                |                 | 0.412   |
| High                          | 88(51.2)       | 76(59.8)        |         |
| Low                           | 21(12.2)       | 15(11.8)        |         |
| Moderate                      | 56(32.6)       | 34(26.8)        |         |
| NA                            | 7(4.1)         | 2(1.6)          |         |
| Chemotherapy (%)              |                |                 | 0.510   |
| Yes                           | 87(50.6)       | 70(55.1)        |         |
| No                            | 85(49.4)       | 57(44.9)        |         |
| Inferred Menopausal State (%) |                |                 | 0.227   |
| Pre                           | 67(39.0)       | 40(31.5)        |         |
| Post                          | 105(61.0)      | 87(68.5)        |         |
| Laterality (%)                |                |                 | 0.694   |
| Left                          | 79(45.9)       | 60(47.2)        |         |
| Right                         | 85(49.4)       | 57(44.9)        |         |
| NA                            | 8(4.7)         | 10(7.9)         |         |
| Grade (%)                     |                |                 | 0.690   |
| 1                             | 1(0.6)         | 2(1.6)          |         |
| 2                             | 21(12.2)       | 15(11.8)        |         |
| 3                             | 149(86.6)      | 108(85.0)       |         |
| NA                            | 1(0.6)         | 2(1.6)          |         |
| Tumor size (mean (SD))        | 23.88(10.28)   | 32.89(24.42)    | <0.001* |
| Tumor stage (%)               |                |                 | 0.233   |
| 1                             | 37(21.5)       | 25(19.7)        |         |
| 2                             | 81(47.1)       | 49(38.6)        |         |
| 3                             | 11(6.4)        | 14(11.0)        |         |
| NA                            | 43(25.0)       | 39(30.7)        |         |
| Positive lymph nodes (%)      |                |                 | 0.900   |
| >5                            | 21(12.2)       | 17(13.4)        |         |
| ≤5                            | 151(87.8)      | 110(86.6)       |         |

NPI: Nottingham prognostic index.

\* P<0.05.
